# Supplementary material for: In Vitro Characterization and Identification of Potential Probiotic Yeasts Isolated from Fermented Dairy and Non-Dairy Food Products
Source: MDPI journal article supplement (doi:10.3390/jof8050544), 2022-05-23
Supplement: s1 [file s1]

## Supplementary Materials

Table S1: Acid tolerance at pH 2.5 during 24 h of incubation at 37 °C for 105 potential probiotic yeast isolates

| Isolate | Source                                                | Survival rate (%) |
|---------|-------------------------------------------------------|-------------------|
| G1      | Gamed (dairy product)                                 | 76.1±3.8          |
| G2      | Gamed (dairy product)                                 | 74.1±3.7          |
| G3      | Gamed (dairy product)                                 | 74.9±3.7          |
| G4      | Gamed (dairy product)                                 | 69.4±3.4          |
| G5      | Gamed (dairy product)                                 | 57.4±2.8          |
| G6      | Gamed (dairy product)                                 | 85.1±4.2          |
| G7      | Gamed (dairy product)                                 | 75.1±3.7          |
| G8      | Gamed (dairy product)                                 | 111.2±5.5         |
| G9      | Gamed (dairy product)                                 | 79.1±3.9          |
| G10     | Gamed (dairy product)                                 | 83.1±4.1          |
| O11     | Egyptian Olive (fermented black olive pickle)         | 45.3±2.2          |
| O12     | Jardanian Olive (fermented black olive pickle)        | 105.8±5.2         |
| O13     | Jardanian Olive (fermented black olive pickle)        | 84.8±4.2          |
| O14     | Jardanian Olive (fermented black olive pickle)        | 70.4±3.5          |
| O15     | Jardanian Olive (fermented black olive pickle)        | 80.1±4.1          |
| O16     | Jardanian Olive (fermented black olive pickle)        | 76.1±3.8          |
| O17     | Jardanian Olive (fermented black olive pickle)        | 78.1±3.9          |
| O18     | Jardanian Olive in oil (fermented black olive pickle) | 95.3±4.7          |
| O19     | Jardanian Olive in oil (fermented black olive pickle) | 100.1±5           |
| O20     | Jardanian Olive in oil (fermented black olive pickle) | 94.2±4.7          |
| O21     | Jardanian Olive in oil (fermented black olive pickle) | 100.6±5           |
| O22     | Jardanian Olive in oil (fermented black olive pickle) | 92.1±4.6          |
| O23     | Jardanian Olive in oil (fermented black olive pickle) | 86.7±4.3          |
| O24     | Jardanian Olive in oil (fermented black olive pickle) | 90.3±4.5          |
| O25     | Moroccan green olives (fermented black olive pickle)  | 83.8±4.1          |
| O26     | Moroccan green olives (fermented green olive pickle)  | 86.1±4.3          |
| O27     | Moroccan green olives (fermented green olive pickle)  | 100.1±5           |
| O28     | Jordanian green olives (fermented green olive pickle) | 102.6±5.1         |
| O29     | Jordanian green olives (fermented green olive pickle) | 119.3±5.9         |
| O30     | Jordanian green olives (fermented green olive pickle) | 83.8±4.1          |
| O31     | Jordanian green olives (fermented green olive pickle) | 70.3±3.5          |
| O32     | Jordanian green olives (fermented green olive pickle) | 95.1±4.7          |
| O33     | Jordanian green olives (fermented green olive pickle) | 106.5±5.3         |
| O34     | Jordanian green olives (fermented green olive pickle) | 82.6±4.1          |
| O35     | Jordanian green olives (fermented green olive pickle) | 105.1±5.2         |
| O36     | Jordanian green olives (fermented green olive pickle) | 85.1±4.2          |
| CH37    | Brie cheese (soft cow's-milk cheese)                  | 85.7±4.2          |

---

|      |                                                          |           |
|------|----------------------------------------------------------|-----------|
| SH38 | Shanklish (dried Labanah traditional fermented by fungi) | 57.1±2.8  |
| SH39 | Shanklish (dried Labanah traditional fermented by fungi) | 82.9±4.1  |
| SH40 | Shanklish (dried Labanah traditional fermented by fungi) | 94.8±4.7  |
| SH41 | Shanklish (dried Labanah traditional fermented by fungi) | 68.1±3.4  |
| SH42 | Shanklish (dried Labanah traditional fermented by fungi) | 85.1±4.2  |
| SH43 | Shanklish (dried Labanah traditional fermented by fungi) | 47.8±2.3  |
| SH44 | Shanklish (dried Labanah traditional fermented by fungi) | 20.9±1.0  |
| SH45 | Shanklish (dried Labanah traditional fermented by fungi) | 96.1±4.8  |
| SH46 | Shanklish (dried Labanah traditional fermented by fungi) | 92.2±4.6  |
| SH47 | Shanklish (dried Labanah traditional fermented by fungi) | 80.9±4.0  |
| SH48 | Shanklish (dried Labanah traditional fermented by fungi) | 68.8±3.4  |
| SH49 | Shanklish (dried Labanah traditional fermented by fungi) | 86.5±4.3  |
| SH50 | Shanklish (dried Labanah traditional fermented by fungi) | 87.1±4.3  |
| SH51 | Shanklish (dried Labanah traditional fermented by fungi) | 75.1±3.7  |
| SH52 | Shanklish (dried Labanah traditional fermented by fungi) | 71.4±3.5  |
| SH53 | Shanklish (dried Labanah traditional fermented by fungi) | 73.3±3.6  |
| SH54 | Shanklish (dried Labanah traditional fermented by fungi) | 133.5±6.6 |
| SH55 | Shanklish (dried Labanah traditional fermented by fungi) | 86.9±4.3  |
| SH56 | Shanklish (dried Labanah traditional fermented by fungi) | 63.9±3.1  |
| D57  | Date fruit                                               | 44.6±2.2  |
| D58  | Date fruit                                               | 34.3±1.7  |
| D59  | Date fruit                                               | 50.2±2.5  |
| O60  | Egyptian Olive (fermented black olive pickle)            | 87.1±4.3  |
| O61  | Egyptian Olive (fermented black olive pickle)            | 96.4±4.8  |
| O62  | Jordan green olives (fermented black olive pickle)       | 81.6±4.0  |
| O63  | Jordanian green olives (fermented black olive pickle)    | 115.5±5.7 |
| O64  | Jordanian green olives (fermented black olive pickle)    | 96.7±4.8  |
| O65  | Jordanian green olives (fermented black olive pickle)    | 92.1±4.6  |
| O66  | Jordanian green olives (fermented black olive pickle)    | 91.7±4.5  |
| O67  | Jordanian green olives (fermented black olive pickle)    | 40.2±2.0  |
| O68  | Jordanian green olives (fermented black olive pickle)    | 44.9±2.2  |
| O69  | Gamed (dairy product)                                    | 75.4±3.7  |
| G70  | Gamed (dairy product)                                    | 59.6±2.9  |
| G71  | Gamed (dairy product)                                    | 79.2±3.9  |
| G72  | Gamed (dairy product)                                    | 51.1±2.5  |
| G73  | Gamed (dairy product)                                    | 70.8±3.5  |
| G74  | Gamed (dairy product)                                    | 37.5±1.8  |
| G75  | Gamed (dairy product)                                    | 79.2±3.9  |
| G76  | Gamed (dairy product)                                    | 19.4±0.9  |
| G77  | Gamed (dairy product)                                    | 88.6±4.4  |
| G78  | Gamed (dairy product)                                    | 78.3±3.9  |
| G79  | Gamed (dairy product)                                    | 51.5±2.5  |
| G80  | Gamed (dairy product)                                    | 75.7±3.7  |

---

|       |                                                          |          |
|-------|----------------------------------------------------------|----------|
| G81   | Gamed (dairy product)                                    | 50.2±2.5 |
| G82   | Gamed (dairy product)                                    | 74.1±3.7 |
| G83   | Gamed (dairy product)                                    | 36.1±1.8 |
| G84   | Gamed (dairy product)                                    | 77.2±3.8 |
| G85   | Gamed (dairy product)                                    | 101.8±5  |
| G86   | Gamed (dairy product)                                    | 70.4±3.5 |
| G87   | Gamed (dairy product)                                    | 93.5±4.6 |
| G88   | Gamed (dairy product)                                    | 67.9±3.3 |
| G89   | Gamed (dairy product)                                    | 70.2±3.5 |
| G90   | Gamed (dairy product)                                    | 64.8±3.2 |
| G91   | Gamed (dairy product)                                    | 67.8±3.3 |
| G92   | Gamed (dairy product)                                    | 87.8±4.3 |
| G93   | Gamed (dairy product)                                    | 53.1±2.6 |
| G94   | Gamed (dairy product)                                    | 70.2±3.5 |
| G95   | Gamed (dairy product)                                    | 69.2±3.4 |
| SH96  | Shanklish (dried Labanah traditional fermented by fungi) | 85.7±4.2 |
| SH97  | Shanklish (dried Labanah traditional fermented by fungi) | 89.4±4.4 |
| SH98  | Shanklish (dried Labanah traditional fermented by fungi) | 92.5±4.6 |
| SH99  | Shanklish (dried Labanah traditional fermented by fungi) | 90.8±4.5 |
| SH100 | Shanklish (dried Labanah traditional fermented by fungi) | 89.9±4.4 |
| SH101 | Shanklish (dried Labanah traditional fermented by fungi) | 75.1±3.7 |
| SH102 | Shanklish (dried Labanah traditional fermented by fungi) | 79.1±3.9 |
| SH103 | Shanklish (dried Labanah traditional fermented by fungi) | 83.6±4.1 |
| SH104 | Shanklish (dried Labanah traditional fermented by fungi) | 85.8±4.2 |
| SH105 | Shanklish (dried Labanah traditional fermented by fungi) | 86.6±4.3 |
